# Supplementary material for: Re-evaluation of low intensity pulsed ultrasound in treatment of tibial fractures (TRUST): randomized clinical trial
Source: PubMed Central journal article supplement — BMJ. 2016 Oct 25;355:i5351. doi: 10.1136/bmj.i5351 (PMC5080447; doi:10.1136/bmj.i5351), 2016-10-25
Supplement: busj032767.ww1_default.pdf [file busj032767.ww1_default.pdf]

**Appendix:** Details of TRUST committees and study investigators; supplementary figure and table [posted as supplied by author]

## **TRUST Committees**

**Study Trial Co-Principal Investigators:** Jason W. Busse, Mohit Bhandari; **Steering**

**Committee:** Mohit Bhandari (Chair), Jason W. Busse, Thomas A. Einhorn, James D. Heckman, Kwok-Sui Leung, Emil H. Schemitsch, Paul Tornetta III, Stephen D. Walter, Gordon H. Guyatt;

**Writing Committee:** Jason W. Busse (chair), Mohit Bhandari, Thomas A. Einhorn, Emil Schemitsch, James D. Heckman, Paul Tornetta III, Kwok-Sui Leung, Diane-Heels-Ansdell,

Gregory J. Della Rocca, Clifford B. Jones, Sun M. Kallyth, Gordon H. Guyatt; **Central**

**Adjudication Committee:** Mohit Bhandari (Chair), Emil H. Schemitsch, David Sanders, Yves

Laflamme; **TRUST Methods Centre Staff: McMaster University, Hamilton, Ontario:** Sheila

Sprague, Paula McKay, Kim Madden, Nicole Simunovic, Diane Heels-Ansdell, Lisa

Buckingham, Helena Viveiros, Qi Zhou, Marilyn Swinton.; **TRUST Data Safety and**

**Monitoring Board Members:** George A. Tomlinson (Chair), Mark Munro, Rob GHH Nelissen.

**TRUST Study Investigators:** *Greenville Health System* – Kyle J. Jeray, J. Scott Broderick, Stephanie L. Tanner, Becky Snider.

*Orthopaedics of Indianapolis* – Dean Maar, Renn Crichlow, Greg Reveal, David Kaehr, Joseph Baele, Kevin Douglas Scheid, David Brokaw, Tim Weber, Brad Jelen, Matt Edison, Anna Clark  
*Temple University Hospital* – Saqib Rehman, Alyssa A. Schaffer, Asif M. Ilyas, J. Milo Sowards, Joanne M. Donnelly.

*QEII Health Sciences Centre* – Chad Coles, Michael Dunbar, David Alexander, David Amirault, Catherine Coady, Mark Glazebrook, Michael Gross, David Johnston, Ross Leighton, William Oxner, Gerald Reardon, William Stanish, Glen Richardson, Michael Biddulph, Kelly Trask, Gwen Dobbin, Shelley MacDonald.

*Duke University Medical Center* – Steven Olson, Robert Zura, Rachel Reilly, Maria Manson.

*University of California, San Francisco/San Francisco General Hospital* – Theodore Mclau, Saam Morshed, Amir Matityahu, Utku Kandemir, Tigist Belaye, Jonathan Kwong.

*Vancouver General Hospital* – Peter O’Brien, Piotr Blachut, Pierre Guy, Henry Broekhuysse, Kelly A Lefaivre, Raman Johal, Irene Leung.

*Orthopaedic Speciality Associates* – Cory A. Collinge, Keith Watson, Derek Dombroski, Tara Craig.

*West Virginia University* – David Hubbard, Michelle A Bramer, John France, E. Barry McDonough, George K. Bal, John P. Lubicky, Brock Lindsey, Robert Santrock, Scott Daffner, Sheila Rye, Christina Carey, Stacy Skidmore, Nina Clovis.

*Rothman Institute* – Javad Parvizi, Matt Austin, John A. Abraham, Charlie Getz, James Purtill, Steven Raikin, Tiffany Morrison, Bora Og.

*Emory University* – Thomas Moore, George Wright, Allen McDonald, Maria Davila, Lauren Rabach, Whitney Barnes.

*Cooper University Hospital* – Kenneth Graf, Robert Ostrum, David Fuller, Robert Marburger

*University of Missouri Health Care* - Gregory J. Della Rocca, Brett D. Crist, Yvonne M. Murtha,

David A. Volgas, James P. Stannard, Toni K. Kliewer, Sharon L. Jarrett, Kelly A. Moore,

Kathleen Markley, Angela Ballew, Abigail K. Stidham.

*Foothills Medical Centre* – Paul Duffy, Robert Korley, Shannon Puloski, Richard Buckley, Kelly

Johnston, Kimberly Carcary, Ross McKercher.

*University of Kentucky* – Jeffrey Selby, Mauro Giordani, Eric Moghadamian, Daniel D. Primm,

Raymond D. Wright Jr, Brandon Bruce, Justin Perry, Amy Trivette, Regina Mosley, Melinda M.

Dowden-Kruger, Dorothy Ross.

*Insall Scott Kelly Institute* – Craig S. Radnay, Timothy Reish, Michael Kang, William Long,

Michael Nett, Priya Chadha, Elizabeth H. Jett, Jesie Paniagua.

*Florida Orthopaedic Institute* – H. Claude Sagi, Anthony Infante, David T. Watson, Daniel

Chan, George Haidukewych, Anjan Shah, Barbara Steverson, Veronica Colon.

*Eastern Maine Medical Center* – David Carmack, Rajendra Tripathi, F. Parke Oldenburg, Denise

Michaud, Teresa White.

*University of South Alabama* – Jorge Alonso, Kelley Prutzman.

*University of British Columbia/Royal Columbian Hospital/Fraser Health Authority* – Trevor

Stone, Kelly Apostle, Dory Boyer, Farhad Moola, Bertrand Perey, Darius Viskontas, H. Michael

Lemke, Robert McCormack, Mauri Zomar, Karyn Moon, Raely Moon, Amber Oatt.

*Shrock Orthopaedic Research* – Kevin Shrock, Matthew Wells, Natalie Shrock

*Denver Health* – David Hak, Philip F Stahel, Mark Hammerberg, Cyril Mauffrey, Corey

Henderson,

Erin Ross, Douglas Gibula, Hannah Gissel.

*University of Virginia* – David B. Weiss, David Kahler, Jacquelyn Sedlock, Vasantha Reddi, Veronica C. Lester-Ballard, Wendy M. Novicoff.

*Pensacola Research Consultants Inc* – Eugene Jean Dabezies, Kurt Morrison, Kirby Turnage, Robert Lurate, Gary Crawley, Donna Lawson, Iris McCants, Anna Brunson, Mary Whitaker, Stefanie White, Michael Ellis.

*Sunnybrook Health Sciences Centre* – Hans Kreder, Terry S. Axelrod, Joel A. Finkelstein, Patrick D.G. Henry, Richard Jenkinson, John J. Murnaghan, Diane Nam, Markku Nousiainen, Sebastian Rodriguez-Elizalde, Veronica M.R. Wadey, Robin Richards, David Stephen and Albert Yee, Katrine Milner, Monica Kunz, Melanie MacNevin, Ayushi Dhingra.

*London Health Sciences Centre* – Abdel-Rahman Lawendy, David Sanders, Christina Tieszer.

*Texas Orthopedic Specialists* – O. David Taunton Jr., Jason Ahuero, Amber Morgan.

*University of Kansas Medical Center* – Archie Heddings, John Sojka, Michael Tilley, Sharon Bradshaw.

*The CORE Institute* - Clifford B Jones, Debra L Sietsema

*Orthopaedic Associates of Michigan* –James R. Ringler, Terrence J. Endres, Jane E. Walker, Susan M. Engerman.

*Lahey Hospital and Medical Center* – Andrew Marcantonio, Michael S. Kain, John Garfi.

*Texas Orthopedics, Sports & Rehabilitation Associates* – Christopher M. Danney, Marc DeHart, Scott Smith, Barbara Bergin, Joel Hurt, Tyler Miller, Todd Curry, Karl Adcock.

*Marshall University* – Franklin D. Shuler, Amber Simmons.

*Southlake Regional Health Centre* – Christopher Lindsay, Cleo Rogakou, Pat Gamble, Debbie Nemtean.

*KSF Orthopaedic Center*– John P. Seaberg, Derrick Clay, Cameron Wood, Todd Curry, Tyler Miller

*Clinical Research Niagara, Inc.* – David Martin, John Song, Robert Josefchak, Paul Robert, Avril McKenna-Norton, Marnie-Lynn Sennett, Olwen McKenna.

*York Hospital/WellSpan Health* – Thomas DiPasquale, Mark Richardson, Paul Muccino, Adrienne Brandon.

*Mission Hospital* – H. Michael Frisch, C. Michael LeCroy, Susan Sutherland, Rachel Alosky, Leslie Elliott, Lynne Hampton, Tracy Nanney, Claudine Cuento, Stephanie Shepard.

*Louisiana State University* – Melissa Gorman, Peter Krause, Ronald Rooney, Jennifer Perilloux.

*Inova Fairfax Hospital* – Robert A. Hymes, Cary Schwartzbach, A. Stephen Malekzadeh, Jeff E. Schulman, Daniel Dziadosz, Laura Thurston, Jihui Li.

*Texas Sports Medicine Institute* – Michael C. Maier, Tyler Miller, Todd Curry.

*Anthony G. Sanzone, MD, Inc* – Anthony Sanzone, Kaelin Schickedanz.

*Orthopaedic Associates of South Broward, P.A* – Steven D. Steinlauf, Richard E. Strain, Daniel Chan, Warren Grossman, Judy Magnum.

*University Orthopaedics Center* – Bradley A. Barter, Douglas Roeshot, Thomas Ellis, Edwin Rogusky, Paula Sensiba, Andrew Marcus, Kenneth Cherry, Sue Jepson, Jennifer Gramley.

**Figure A:** Sensitivity analysis of SF-36 PCS scores using a non-linear model to impute missing data

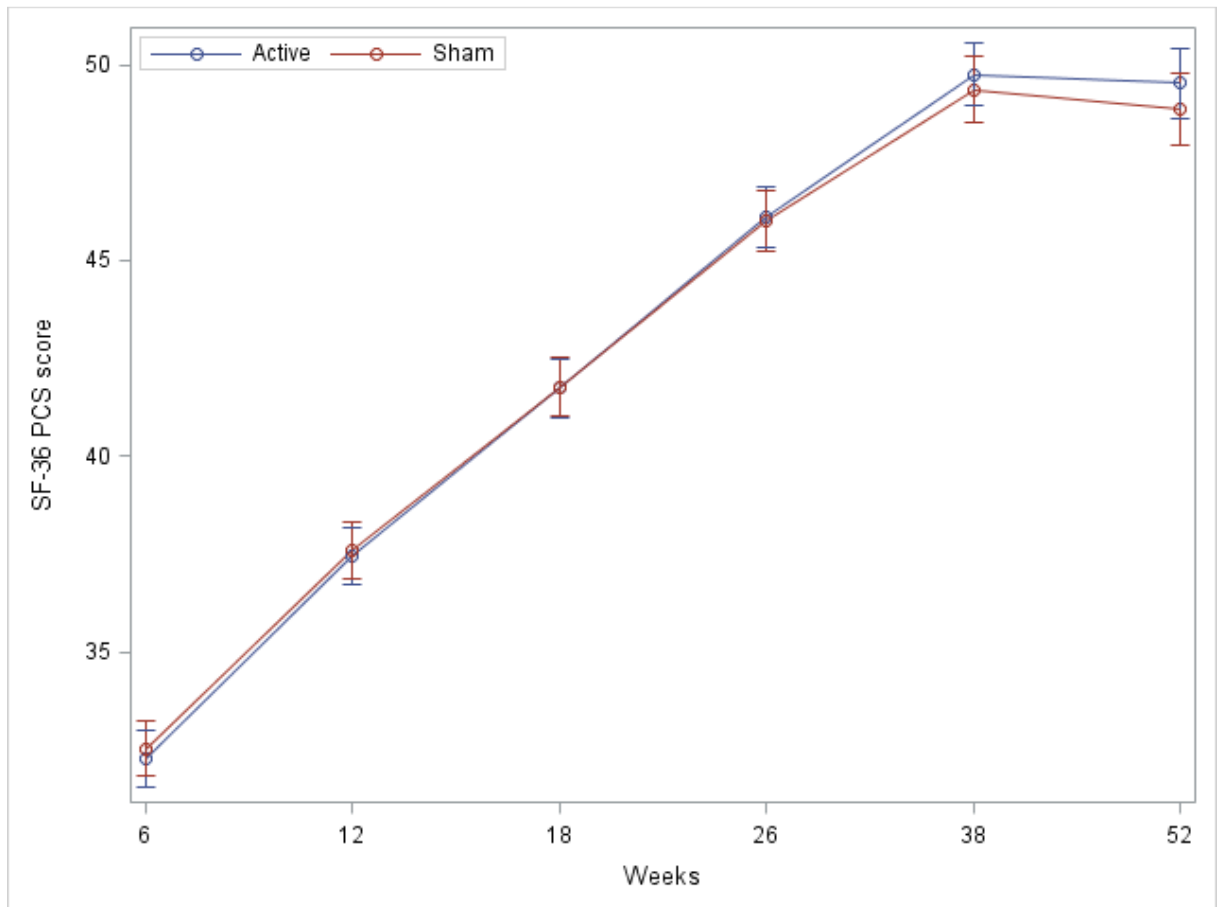

**Table A: Patients affected by early trial stoppage**

| <b>Follow-up visit</b> | <b>No. of patients affected by early stoppage at each visit</b> | <b>Cumulative no. of patients affected by early stoppage</b> |
|------------------------|-----------------------------------------------------------------|--------------------------------------------------------------|
| 6 week visit           | 3                                                               | 3                                                            |
| 12 week visit          | 3                                                               | 6                                                            |
| 18 week visit          | 3                                                               | 9                                                            |
| 26 week visit          | 32                                                              | 41                                                           |
| 38 week visit          | 30                                                              | 71                                                           |
| 52 week visit          | 2                                                               | 73                                                           |

**Table B: SF-36 PCS scores for LIPUS and sham therapy**

| <b>Follow-up Visit</b> | <b>Active</b> |                  | <b>Sham</b> |                  |
|------------------------|---------------|------------------|-------------|------------------|
|                        | <b>N</b>      | <b>Mean (SD)</b> | <b>N</b>    | <b>Mean (SD)</b> |
| 6 weeks                | 237           | 31.8 (8.4)       | 238         | 32.0 (7.6)       |
| 12 weeks               | 227           | 39.4 (8.9)       | 215         | 38.6 (9.0)       |
| 18 weeks               | 212           | 43.5 (9.9)       | 193         | 43.6 (9.4)       |
| 26 weeks               | 193           | 46.6 (9.2)       | 182         | 46.3 (8.9)       |
| 38 weeks               | 160           | 48.4 (8.7)       | 145         | 48.4 (8.8)       |
| 52 weeks               | 153           | 51.0 (7.9)       | 148         | 49.3 (8.8)       |



**Table C: HUI-III scores at each follow-up for LIPUS and sham therapy**

| Follow-up Visit | Active |               | Sham |               |
|-----------------|--------|---------------|------|---------------|
|                 | N      | Mean (SD)     | N    | Mean (SD)     |
| 6 weeks         | 237    | 0.515 (0.253) | 238  | 0.509 (0.255) |
| 12 weeks        | 227    | 0.667 (0.240) | 215  | 0.659 (0.244) |
| 18 weeks        | 212    | 0.761 (0.225) | 193  | 0.756 (0.239) |
| 26 weeks        | 194    | 0.812 (0.201) | 182  | 0.812 (0.212) |
| 38 weeks        | 160    | 0.838 (0.194) | 144  | 0.834 (0.192) |
| 52 weeks        | 153    | 0.853 (0.190) | 149  | 0.846 (0.192) |

**Table D: Radiographic healing at each follow-up for LIPUS and sham therapy \***

| <b>Follow-up Visit</b> | <b>Active</b>  | <b>Sham</b>    | <b>Total</b>   |
|------------------------|----------------|----------------|----------------|
| 6 weeks                | 1/238 (0.4)    | 0/240 (0.0)    | 1/478 (0.2)    |
| 12 weeks               | 54/225 (24.0)  | 49/218 (22.5)  | 103/443 (23.3) |
| 18 weeks               | 142/214 (66.4) | 125/201 (62.2) | 267/415 (64.3) |
| 26 weeks               | 189/213 (88.7) | 167/197 (84.8) | 356/410 (86.8) |
| 38 weeks               | 200/205 (97.6) | 188/194 (96.9) | 388/399 (97.2) |
| 52 weeks               | 206/209 (98.6) | 194/195 (99.5) | 400/404 (99.0) |

\* We included patients affected by early trial stoppage if they achieved radiographic healing before the trial was terminated

**Table E: Return to work at each follow-up for LIPUS and sham therapy (368 patients were employed prior to their injury) \***

|                        | Achieved the Event, n (%) |                |                |
|------------------------|---------------------------|----------------|----------------|
|                        | Active                    | Sham           | Total          |
| <b>Follow-up Visit</b> |                           |                |                |
| 6 weeks                | 7/171 (4.1)               | 8/170 (4.7)    | 15/341 (4.4)   |
| 12 weeks               | 31/166 (18.7)             | 27/153 (17.6)  | 58/319 (18.2)  |
| 18 weeks               | 60/160 (37.5)             | 64/147 (43.5)  | 124/307 (40.4) |
| 26 weeks               | 90/153 (58.8)             | 85/146 (58.2)  | 175/299 (58.5) |
| 38 weeks               | 114/149 (76.5)            | 104/134 (77.6) | 218/283 (77.0) |
| 52 weeks               | 126/149 (84.6)            | 110/138 (79.7) | 236/287 (82.2) |

\* We included patients affected by early trial stoppage if they reported return to work without limitations before the trial was terminated

**Table F: Return to household activities at each follow-up for LIPUS and sham therapy \***

|                        | Achieved the Event, n (%) |                |                |
|------------------------|---------------------------|----------------|----------------|
|                        | Active                    | Sham           | Total          |
| <b>Follow-up Visit</b> |                           |                |                |
| 6 weeks                | 6/237 (2.5)               | 3/238 (1.3)    | 9/475 (1.9)    |
| 12 weeks               | 32/227 (14.1)             | 28/215 (13.0)  | 60/442 (13.6)  |
| 18 weeks               | 68/217 (31.3)             | 69/196 (35.2)  | 137/413 (33.2) |
| 26 weeks               | 102/202 (50.5)            | 102/193 (52.8) | 204/395 (51.6) |
| 38 weeks               | 128/189 (67.7)            | 130/171 (76.0) | 258/360 (71.7) |
| 52 weeks               | 157/190 (82.6)            | 147/185 (79.5) | 304/375 (81.1) |

\* We included patients affected by early trial stoppage if they reported return to household activities without limitations before the trial was terminated

**Table G: Return to full weight-bearing at each follow-up for LIPUS and sham therapy \***

|                        | Achieved the Event, n (%) |                 |                |
|------------------------|---------------------------|-----------------|----------------|
|                        | Active                    | Sham            | Total          |
| <b>Follow-up Visit</b> |                           |                 |                |
| 6 weeks                | 82/238 (34.4)             | 92/240 (38.3)   | 174/478 (36.4) |
| 12 weeks               | 188/234 (80.3)            | 194/229 (84.7)  | 382/463 (82.5) |
| 18 weeks               | 224/232 (96.6)            | 221/226 (97.8)  | 445/458 (97.2) |
| 26 weeks               | 233/234 (99.6)            | 225/227 (99.1)  | 458/461 (99.3) |
| 38 weeks               | 234/235 (99.6)            | 227/227 (100.0) | 461/462 (99.8) |
| 52 weeks               | 234/235 (99.6)            | 227/227 (100.0) | 461/462 (99.8) |

\* We included patients affected by early trial stoppage if they achieved full weight-bearing before the trial was terminated

**Table H: Return to  $\geq 80\%$  pre-injury function at each follow-up for LIPUS and sham therapy \***

|                        | Achieved the Event, n (%) |                |                |
|------------------------|---------------------------|----------------|----------------|
|                        | Active                    | Sham           | Total          |
| <b>Follow-up Visit</b> |                           |                |                |
| 6 weeks                | 40/237 (16.9)             | 48/238 (20.2)  | 88/475 (18.5)  |
| 12 weeks               | 100/230 (43.5)            | 97/221 (43.9)  | 197/451 (43.7) |
| 18 weeks               | 156/221 (70.6)            | 148/208 (71.2) | 304/429 (70.9) |
| 26 weeks               | 181/221 (81.9)            | 176/209 (84.2) | 357/430 (83.0) |
| 38 weeks               | 197/216 (91.2)            | 188/204 (92.2) | 385/420 (91.7) |
| 52 weeks               | 206/216 (95.4)            | 196/209 (93.8) | 402/425 (94.6) |

\* We included patients affected by early trial stoppage if they reported  $\geq 80\%$  pre-injury function before the trial was terminated

**Table I: Return to leisure activities at each follow-up for LIPUS and sham therapy \***

|                        | Achieved the Event, n (%) |               |                |
|------------------------|---------------------------|---------------|----------------|
|                        | Active                    | Sham          | Total          |
| <b>Follow-up Visit</b> |                           |               |                |
| 6 weeks                | 3/237 (1.3)               | 1/238 (0.4)   | 4/475 (0.8)    |
| 12 weeks               | 16/226 (7.1)              | 6/214 (2.8)   | 22/440 (5.0)   |
| 18 weeks               | 30/214 (14.0)             | 26/193 (13.5) | 56/407 (13.8)  |
| 26 weeks               | 58/199 (29.1)             | 51/184 (27.7) | 109/383 (28.5) |
| 38 weeks               | 82/174 (47.1)             | 72/153 (47.1) | 154/327 (47.1) |
| 52 weeks               | 99/175 (56.6)             | 95/166 (57.2) | 194/341 (56.9) |

\* We included patients affected by early trial stoppage if they reported returning to leisure activities without limitations before the trial was terminated
